## OBITUARY.

---

### JOHN HEPWORTH, M.R.C.S.

Died, 28th January, John Hepworth, M.R.C.S., at Croft's Bank, near Manchester, æt. 62, after a brief illness. Three days before he had been explaining a fine celestial microscope to a few friends, and seemed then much in his usual health, complaining, however, of spasms.

He was a pupil of Mr. Jordan, of Manchester; then studied at the Middlesex Hospital; commenced practice in 1827. His published communications all appeared in the 'Quart. Jour. Mic. Sci.' as follows:—"On the Foot of the Fly," Vol. II, 1854; two short additions on the same subject in Vols. III, IV, 1855-56; "On the Mandibles of Acari," Vol. IV; "Practical Use of the Microscope" (in Medicine), Vol. V; a more extended article on the same subject, with the title "On Compound Nucleated Cells," in the same year; in Vol. V, N. S., appeared a paper "On the (Microscopic) Structure of the Horse's Foot."

Mr. Hepworth's collection of microscopic objects, most of which were mounted by himself, exceeded in number any other collection in Britain. These are now in the possession of his son, Mr. Francis Hepworth, M.R.C.S., of Eccles.

The use of transparent carmine injection, after the model of the beautiful ones imported from the Continent, had received much attention, and a great deal, both of time and money, had been given to it with fair success.

For some time before his death Mr. Hepworth had devoted much time to the examination of polarized light; he had intended shortly to give the results of his researches to the public. Unfortunately his ideas on the subject are not committed to paper.

Mr. Hepworth was always ready to impart information to those whom he thought capable of appreciating it. His lectures at the Mechanics' Institutions in his neighbourhood were invariably well attended.

He was a man of genial disposition, and a great favourite with all who had the privilege of intercourse with him.
